# Supplementary material for: An Alternative Device for the Topical Treatment of Oral Cancer: Development and Ex-Vivo Evaluation of Imiquimod-Loaded Polysaccharides Formulations
Source: MDPI journal article supplement (doi:10.3390/pharmaceutics14122573), 2022-11-23
Supplement: s1 [file s1]

### Supplemental material

**Table S1.** Percentage composition of the preliminary formulations.

| Component         | Gel 1 | Gel ISO | Gel ISO2 |
|-------------------|-------|---------|----------|
| IMQ               | 0.05  | 0.06    | 0.19     |
| Alginate          | 0.95  | 0.43    | 0.43     |
| CMChit            | 0.95  | -       | -        |
| CaCl <sub>2</sub> | 0.02  | 0.03    | 0.03     |
| Propylene glycol  | 0.99  | 4.33    | 4.33     |
| Water             | 97.05 | 93.10   | 92.98    |
| Xanthan gum       | -     | 0.87    | 0.87     |
| Isostearic acid   | -     | 1.17    | 1.17     |

**Table S2.** P values obtained from t-test analysis for IMQ amount retained and permeated across porcine skin for all the formulation prepared.

| Formulation                        | Micelles     | CMChit+A gel | A+X gel      | X gel        | A+X Film     | A+X Film with backing | X Film no crosslinked | X Film no crosslinked with backing | X Film 120°C 20 min with backing |
|------------------------------------|--------------|--------------|--------------|--------------|--------------|-----------------------|-----------------------|------------------------------------|----------------------------------|
| Micelles                           | -            | 0.001; 0.008 | 0.175; 0.020 | 0.796; 0.572 | 0.383; 0.226 | 0.028; 0.007          | 0.130; 0.012          | 0.063; 0.863                       | 0.148; 0.001                     |
| CMChit+A gel                       | 0.001; 0.008 | -            | 0.087; 0.002 | 0.052; 0.021 | 0.115; 0.088 | 0.004; 0.085          | 0.085; 0.673          | 0.047; 0.008                       | 0.001; 0.171                     |
| A+X gel                            | 0.175; 0.020 | 0.087; 0.002 | -            | 0.305; 0.180 | 0.813; 0.018 | 0.955; 0.001          | 0.918; 0.003          | 0.056; 0.026                       | 0.035; 0.001                     |
| X gel                              | 0.796; 0.572 | 0.052; 0.021 | 0.305; 0.180 | -            | 0.433; 0.198 | 0.239; 0.045          | 0.271; 0.021          | 0.067; 0.639                       | 0.537; 0.006                     |
| A+X Film                           | 0.383; 0.226 | 0.115; 0.088 | 0.813; 0.018 | 0.433; 0.198 | -            | 0.743; 0.356          | 0.744; 0.076          | 0.058; 0.201                       | 0.089; 0.017                     |
| A+X Film with backing              | 0.028; 0.007 | 0.004; 0.085 | 0.955; 0.001 | 0.239; 0.045 | 0.743; 0.356 | -                     | 0.934; 0.086          | 0.055; 0.007                       | 0.011; 0.003                     |
| X Film no crosslinked              | 0.130; 0.012 | 0.085; 0.673 | 0.918; 0.003 | 0.271; 0.021 | 0.744; 0.076 | 0.934; 0.086          | -                     | 0.055; 0.011                       | 0.055; 0.011                     |
| X Film no crosslinked with backing | 0.063; 0.863 | 0.047; 0.008 | 0.056; 0.026 | 0.067; 0.639 | 0.058; 0.201 | 0.055; 0.007          | 0.055; 0.011          | -                                  | 0.033; 0.001                     |
| X Film 120°C 20 min with backing   | 0.148; 0.001 | 0.001; 0.171 | 0.035; 0.001 | 0.537; 0.006 | 0.089; 0.017 | 0.011; 0.003          | 0.027; 0.467          | 0.033; 0.001                       | -                                |
